# Supplementary material for: Metastable layered lithium-rich niobium and tantalum oxides via nearly instantaneous cation exchange
Source: Royal Society of Chemistry journal article supplement (doi:10.1039/d4fd00103f), 2024-09-20
Supplement: d4fd00103f1.pdf [file d4fd00103f1.pdf]

## *Supporting Information*

### **Metastable Layered Lithium-rich Niobium and Tantalum Oxides via Nearly Instantaneous Ion Exchange**

Sarah L. Ko,<sup>1</sup> Jordan A. Dorrell,<sup>2</sup> Andrew J. Morris,<sup>2</sup> Kent J. Griffith<sup>1,3\*</sup>

<sup>1</sup>Department of Chemistry and Biochemistry, University of California, San Diego, California 92093, United States

<sup>2</sup>School of Metallurgy and Materials, University of Birmingham, Edgbaston, Birmingham B15 2TT, United Kingdom

<sup>3</sup>Program in Materials Science and Engineering, University of California, San Diego, California 92093, United States

\*E-mail: k3griffith@ucsd.edu

## Table of Contents

### Supplementary Figures

Supplementary Figure S1 –  $T_1$  magnetization saturation recovery curves of  ${}^6\text{Li}$ ,  ${}^7\text{Li}$ , and  ${}^{23}\text{Na}$  for  $A_3\text{MO}_4$  ( $A = \text{Li, Na}; M = \text{Nb, Ta}$ ).

Supplementary Figure S2 –  ${}^{93}\text{Nb}$  NMR spectra of  $\text{LiNbO}_3$  and  $\text{NaNbO}_3$

Supplementary Figure S3 – Neutron powder diffraction patterns of  $\text{L-Na}_3\text{NbO}_4$  and  $\text{L-Li}_3\text{NbO}_4$  at 20 K and 300 K

Supplementary Figure S4 – Rietveld refinement of  $\text{L-Na}_3\text{NbO}_4$  and  $\text{L-Li}_3\text{NbO}_4$  at 300K

Supplementary Figure S5 – Scanning electron microscopy images of  $A_3\text{MO}_4$  ( $A = \text{Li, Na}; M = \text{Nb, Ta}$ )

Supplementary Figure S6 – Particle size distributions of  $A_3\text{MO}_4$  ( $A = \text{Li, Na}; M = \text{Nb, Ta}$ )

Supplementary Figure S7 –  ${}^{93}\text{Nb}$  NMR spectra of  $c\text{-Li}_3\text{NbO}_4$

Supplementary Figure S8 – Water instability of  $\text{L-Na}_3\text{NbO}_4$ .

### Supplementary Tables

Supplementary Table S1 –  $T_1$  relaxation times of  ${}^6\text{Li}$ ,  ${}^7\text{Li}$ , and  ${}^{23}\text{Na}$  for  $A_3\text{MO}_4$  ( $A = \text{Li, Na}; M = \text{Nb, Ta}$ )

Supplementary Table S2 – Experimental  ${}^6\text{Li}$ ,  ${}^7\text{Li}$ ,  ${}^{23}\text{Na}$ , and  ${}^{93}\text{Nb}$  NMR measurement times

Supplementary Table S3 – Calculated lattice and NMR parameters for layered  $A_3\text{MO}_4$  ( $A = \text{Li, Na}; M = \text{Nb, Ta}$ )

Supplementary Table S4 – Calculated lattice and NMR parameters for  $\text{L-Li}_3\text{NbO}_4$  containing residual  $\text{Na}^+$

Supplementary Table S5 – Calculated lattice and NMR parameters for  $\text{L-Li}_3\text{NbO}_4$  containing residual  $\text{H}^+$

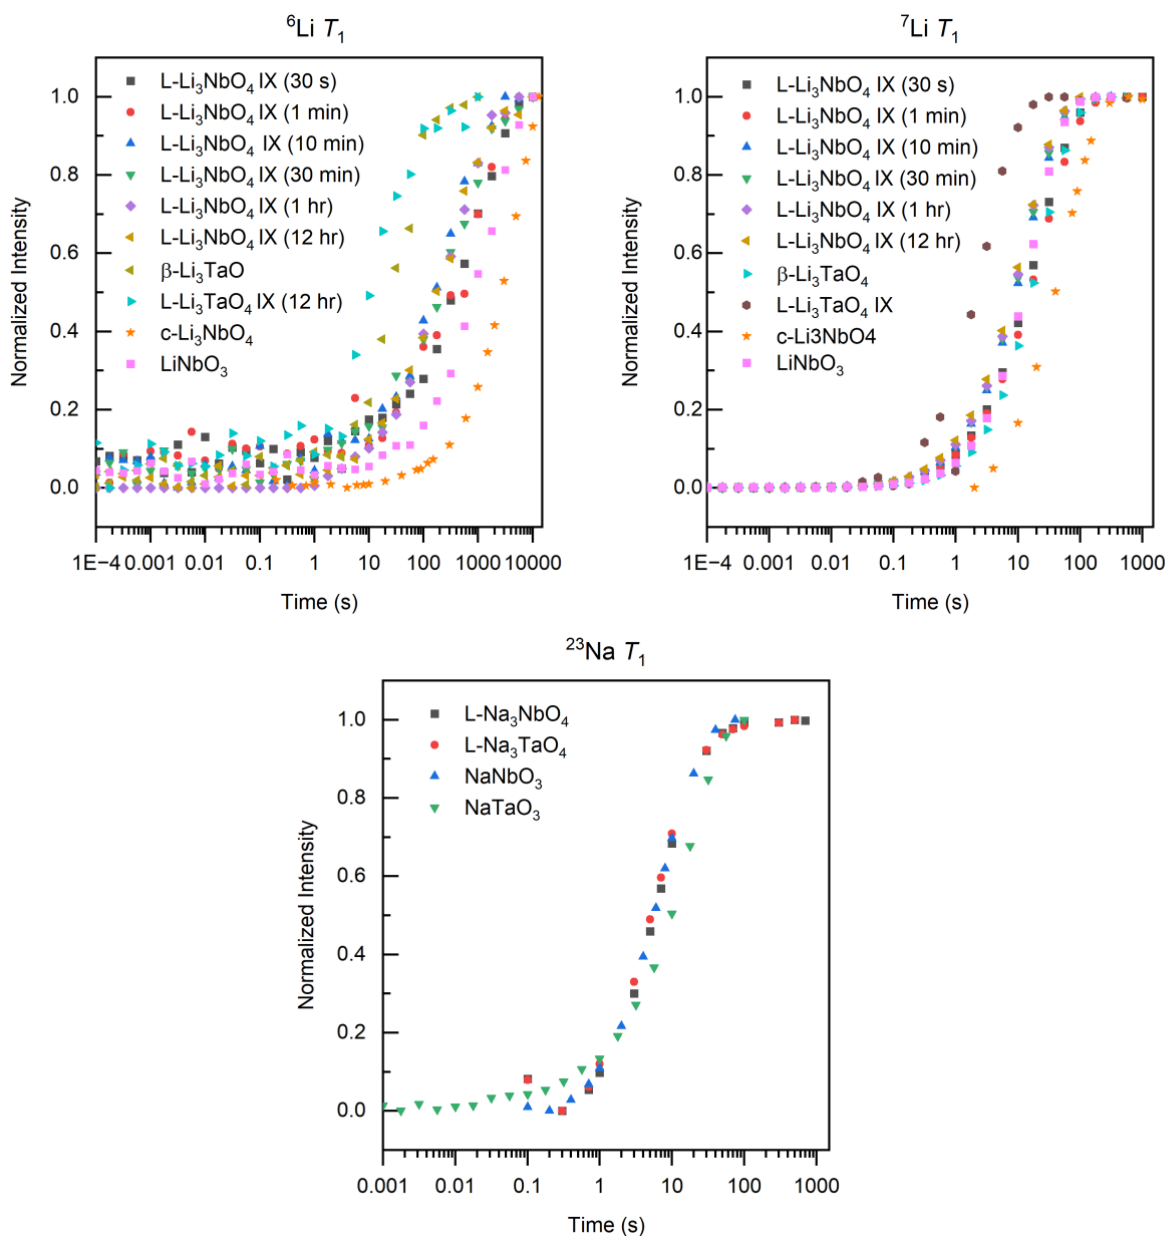

**Supplementary Figure S1.**  $T_1$  magnetization saturation recovery curves of  ${}^6\text{Li}$ ,  ${}^7\text{Li}$ , and  ${}^{23}\text{Na}$  for  $A_3MO_4$  ( $A = \text{Li}, \text{Na}; M = \text{Nb}, \text{Ta}$ ).

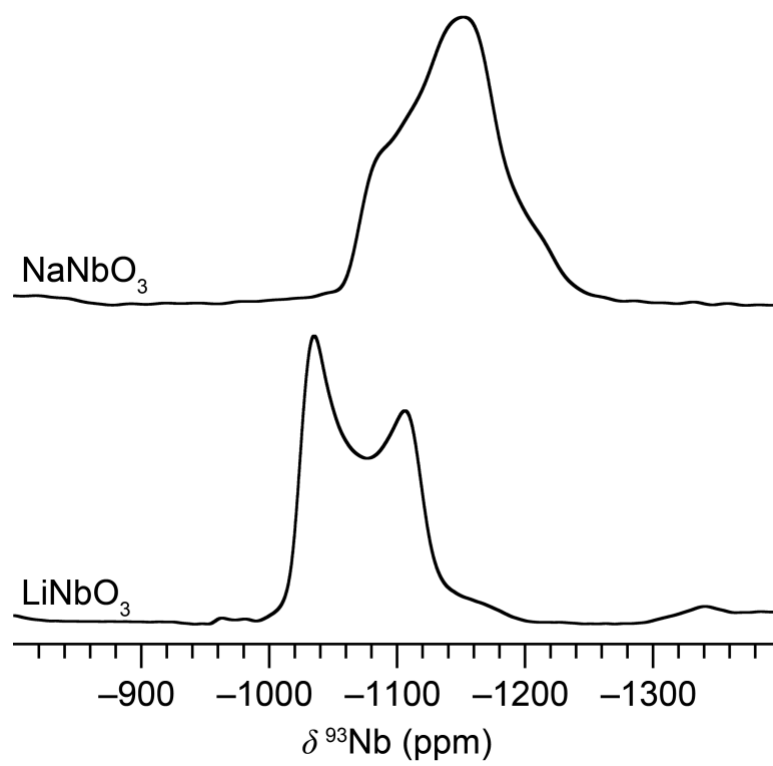

**Supplementary Figure S2.**  $^{93}\text{Nb}$  NMR spectra of  $\text{LiNbO}_3$  and  $\text{NaNbO}_3$  at 30 kHz MAS and 9.4 T.

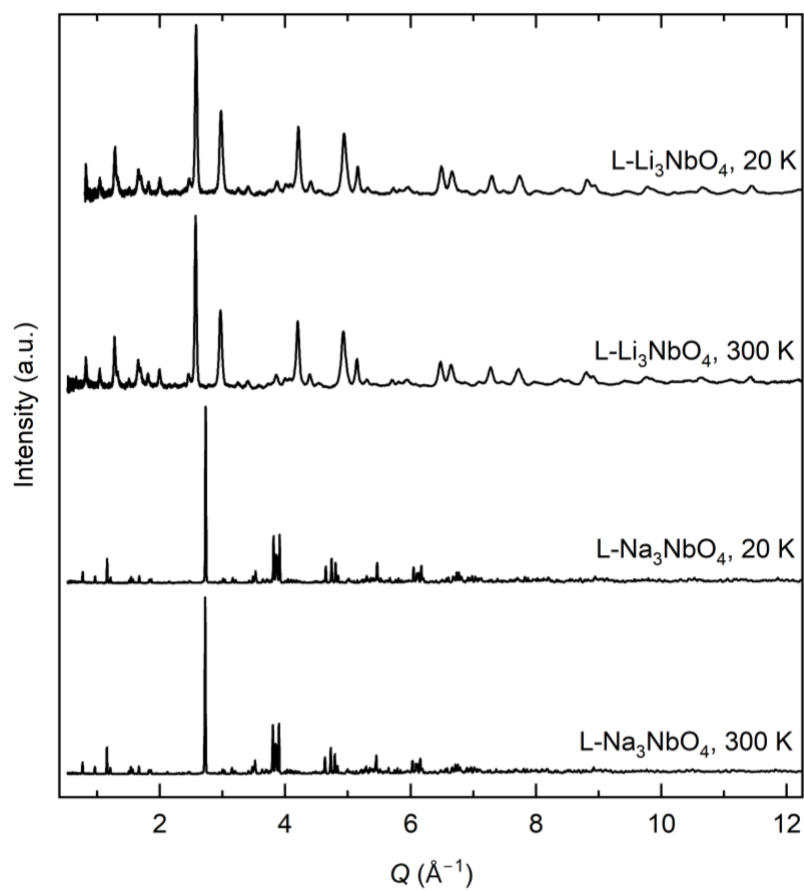

**Supplementary Figure S3.** Neutron powder diffraction patterns of L- $\text{Na}_3\text{NbO}_4$  and L- $\text{Li}_3\text{NbO}_4$  at 20 K and 300 K.

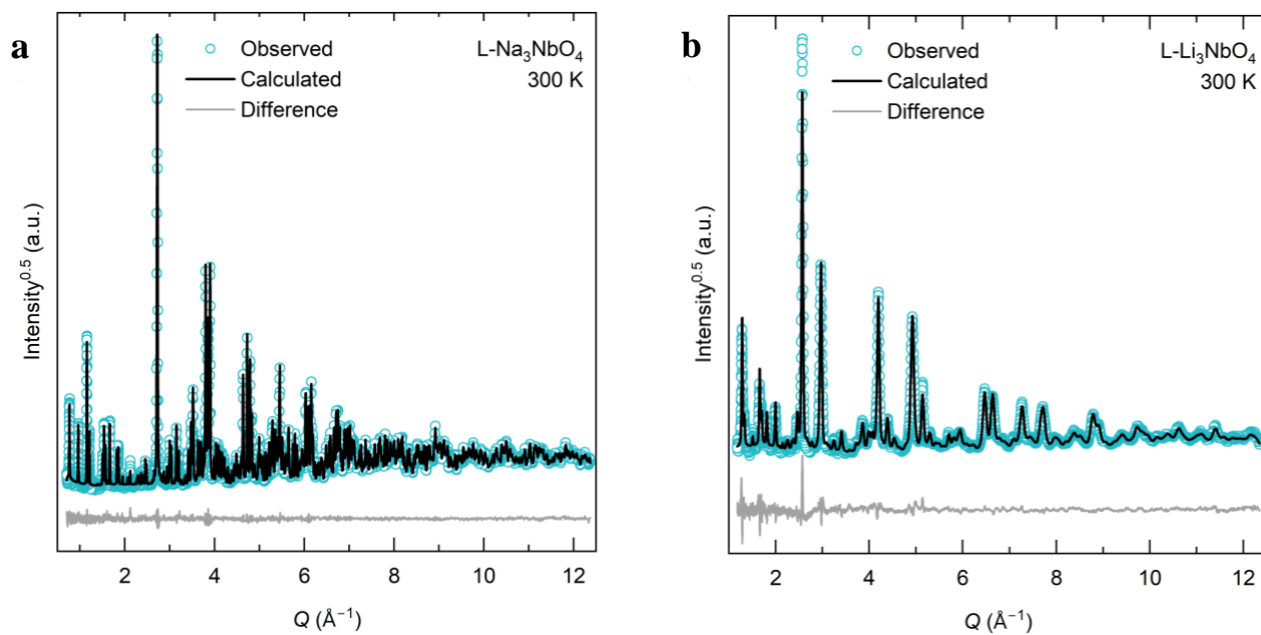

**Supplementary Figure S4.** Rietveld refinement of L-Li<sub>3</sub>NbO<sub>4</sub> and L-Na<sub>3</sub>NbO<sub>4</sub> with neutron powder diffraction data measured at 300 K. Square-root intensity is shown to better depict data to high  $Q$ .

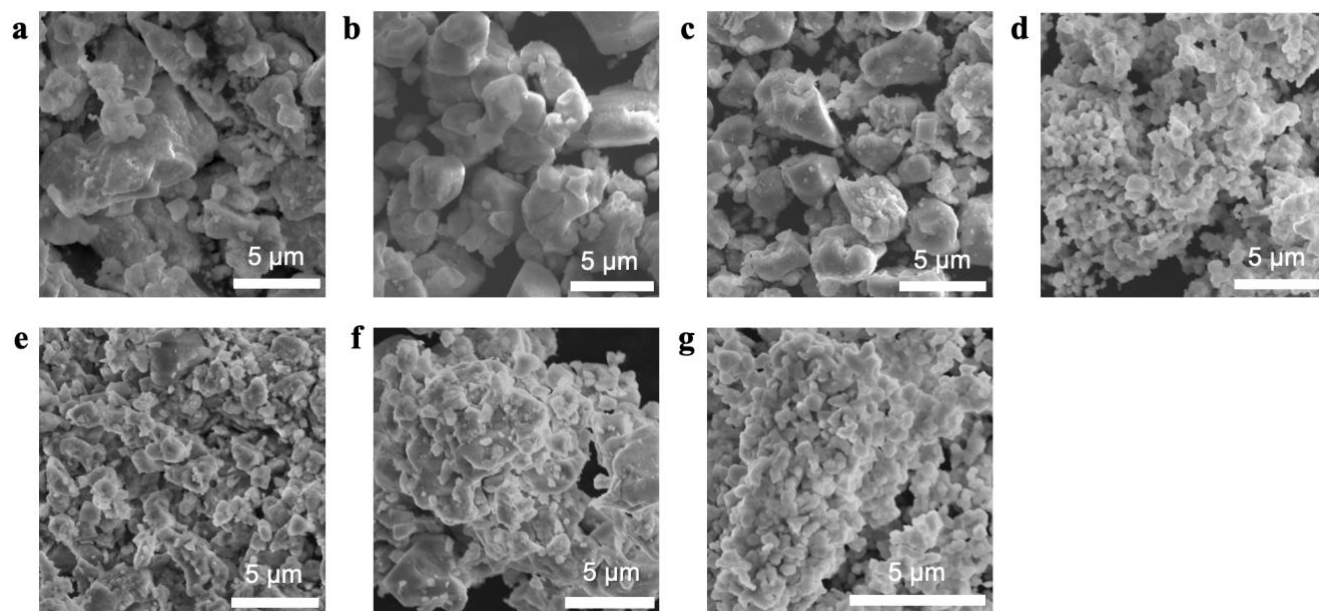

**Supplementary Figure S5.** Scanning electron microscopy images of  $A_3MO_4$  ( $A = \text{Li, Na}; M = \text{Nb, Ta}$ ). (a)  $\text{L-Na}_3\text{NbO}_4$ , (b)  $\text{L}'\text{-Li}_3\text{NbO}_4$  (1 min IX), (c)  $\text{L-Li}_3\text{NbO}_4$  (12 hours IX), (d)  $\text{c-Li}_3\text{NbO}_4$ , (e)  $\text{L-Na}_3\text{TaO}_4$ , (f)  $\text{L-Li}_3\text{TaO}_4$ , (g)  $\beta\text{-Li}_3\text{TaO}_4$ .

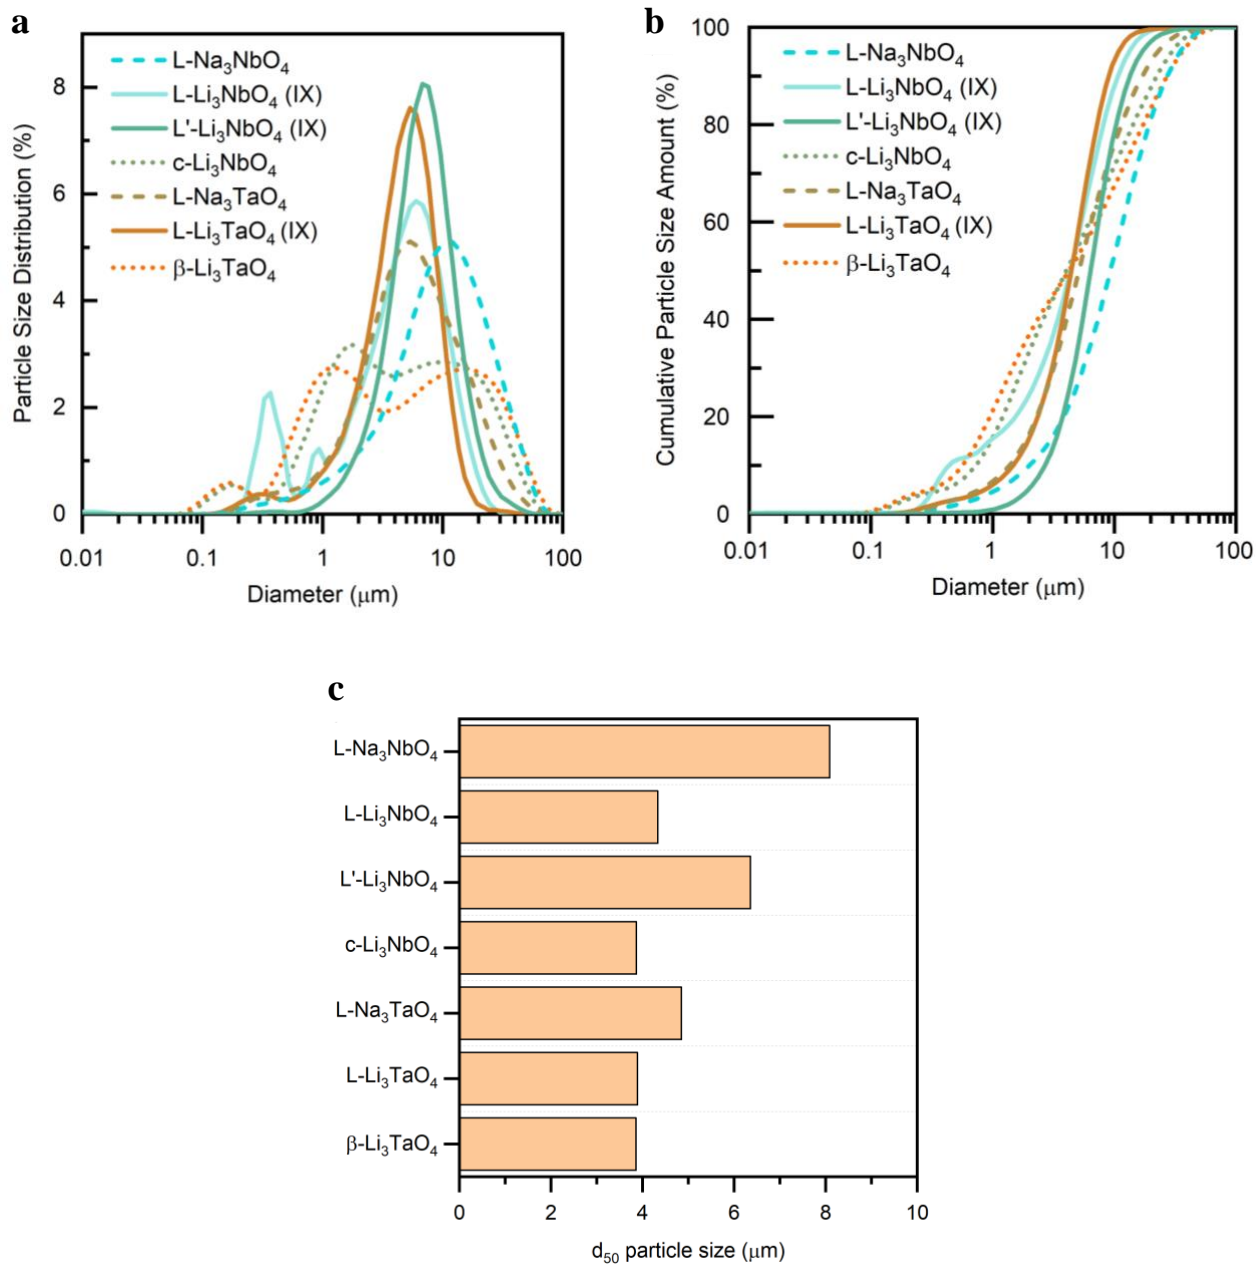

**Supplementary Figure S6.** Particle size distributions of  $A_3MO_4$  ( $A = \text{Li}, \text{Na}; M = \text{Nb}, \text{Ta}$ ). Particle size distribution by (a) volume percentage, (b) cumulative distribution, and (c)  $d_{50}$ .



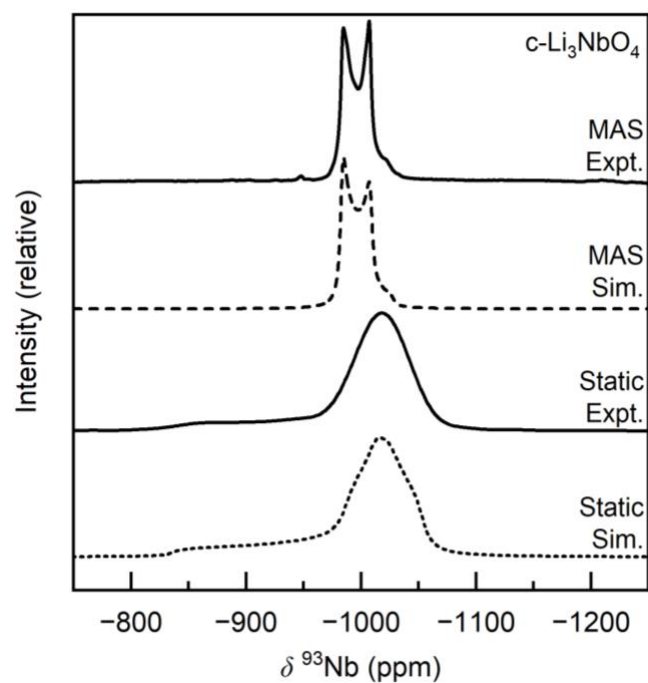

**Supplementary Figure S7.**  $^{93}\text{Nb}$  NMR spectra of  $c\text{-Li}_3\text{NbO}_4$  under static and 30 kHz MAS conditions at 9.4 T. Spectra are intensity normalized. Simulations are fit with the parameters listed in Table 3.

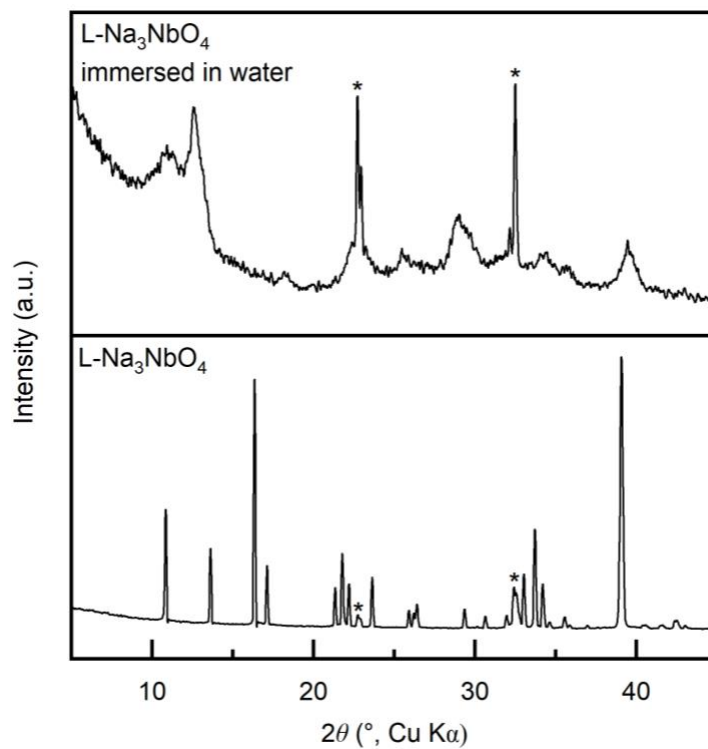

**Supplementary Figure S8.** Water instability of L-Na<sub>3</sub>NbO<sub>4</sub>. X-ray diffraction patterns of L-Na<sub>3</sub>NbO<sub>4</sub> before and after immersion in water for 1 hr. The water-immersed sample was dried overnight in air at 80 °C prior to XRD. Asterisks denote observed NaNbO<sub>3</sub> reflections. The NaNbO<sub>3</sub> impurity is water stable.

**Supplementary Table S1.**  $T_1$  relaxation times of  ${}^6\text{Li}$ ,  ${}^7\text{Li}$ , and  ${}^{23}\text{Na}$  for  $A_3MO_4$  ( $A = \text{Li, Na}; M = \text{Nb, Ta}$ ).

|                                     | ${}^6\text{Li } T_1$ (s)     | ${}^7\text{Li } T_1$ (s) |      |
|-------------------------------------|------------------------------|--------------------------|------|
|                                     | 30 s                         | >800                     | 19.9 |
|                                     | 1 min                        | >600                     | 22.7 |
| L- $\text{Li}_3\text{NbO}_4$ (IX)   | 10 min                       | 237                      | 13.3 |
|                                     | 30 min                       | 305                      | 12.7 |
|                                     | 1 hr                         | 340                      | 12.2 |
|                                     | 12 hr                        | 456                      | 11.7 |
|                                     | c- $\text{Li}_3\text{NbO}_4$ | 4040                     | 59   |
| $\text{LiNbO}_3$                    | 1236                         | 17.6                     |      |
| L- $\text{Li}_3\text{TaO}_4$ (IX)   | 15.5                         | 3.2                      |      |
| $\beta$ - $\text{Li}_3\text{TaO}_4$ | 43.0                         | 23.7                     |      |
|                                     | ${}^{23}\text{Na } T_1$ (s)  |                          |      |
| L- $\text{Na}_3\text{NbO}_4$        | 8.4                          |                          |      |
| $\text{NaNbO}_3$                    | 7.9                          |                          |      |
| L- $\text{Na}_3\text{TaO}_4$        | 7.6                          |                          |      |
| $\text{NaTaO}_3$                    | 13.5                         |                          |      |

**Supplementary Table S2.** Experimental  $^6\text{Li}$ ,  $^7\text{Li}$ ,  $^{23}\text{Na}$ , and  $^{93}\text{Nb}$  NMR measurement times.

|                                                           | $^6\text{Li}$ |          | $^7\text{Li}$ |          | $^{23}\text{Na}$ |          | $^{93}\text{Nb}$ |          |
|-----------------------------------------------------------|---------------|----------|---------------|----------|------------------|----------|------------------|----------|
|                                                           | d1 (s)        | No. FIDs | d1 (s)        | No. FIDs | d1 (s)           | No. FIDs | d1 (s)           | No. FIDs |
| L-Li <sub>3</sub> NbO <sub>4</sub> (IX)<br>30 s           | 4000          | 36       | 100           | 8        | 40               | 120      | 0.5              | 8192     |
| L-Li <sub>3</sub> NbO <sub>4</sub> (IX)<br>1 min          | 3000          | 24       | 115           | 4        | 40               | 120      | 0.5              | 8192     |
| L-Li <sub>3</sub> NbO <sub>4</sub> (IX)<br>10 min         | 1190          | 44       | 67            | 8        | 40               | 120      | 0.5              | 8192     |
| L-Li <sub>3</sub> NbO <sub>4</sub> (IX)<br>30 min         | 2500          | 36       | 65            | 8        | 40               | 120      | 0.5              | 8192     |
| L-Li <sub>3</sub> NbO <sub>4</sub> (IX)<br>1 hr           | 1750          | 40       | 65            | 4        | 40               | 120      | 0.5              | 8192     |
| L-Li <sub>3</sub> NbO <sub>4</sub> (IX)<br>12 hr          | 2110          | 20       | 60            | 4        | 40               | 120      | 0.5              | 8192     |
| L-Li <sub>3</sub> NbO <sub>4</sub> (IX)<br>1 min unwashed | n/r           | n/r      | n/r           | n/r      | 40               | 1320     | 0.5              | 8192     |
| L-Li <sub>3</sub> NbO <sub>4</sub> (IX)<br>12 hr unwashed | n/r           | n/r      | n/r           | n/r      | 40               | 1320     | 0.5              | 16,384   |
| c-Li <sub>3</sub> NbO <sub>4</sub>                        | 13,000        | 1        | 300           | 1        | n/a              | n/a      | 2                | 192      |
| L-Li <sub>3</sub> TaO <sub>4</sub> (IX)                   | 80            | 184      | 16            | 16       | 40               | 1472     | n/a              | n/a      |
| $\beta$ -Li <sub>3</sub> TaO <sub>4</sub>                 | 200           | 284      | 80            | 16       | n/a              | n/a      | n/a              | n/a      |
| L-Na <sub>3</sub> NbO <sub>4</sub>                        | n/a           | n/a      | n/a           | n/a      | 15               | 1024     | 4                | 592      |
| NaNbO <sub>3</sub>                                        | n/a           | n/a      | n/a           | n/a      | 40               | 60       | 0.5              | 256      |
| L-Na <sub>3</sub> TaO <sub>4</sub>                        | n/a           | n/a      | n/a           | n/a      | 40               | 128      | n/a              | n/a      |
| NaTaO <sub>3</sub>                                        | n/a           | n/a      | n/a           | n/a      | 40               | 60       | n/a              | n/a      |

n/a = not applicable; n/r = not recorded

**Supplementary Table S3.** DFT calculated lattice and NMR parameters for layered  $A_3MO_4$  ( $A = \text{Li}, \text{Na}; M = \text{Nb}, \text{Ta}$ ).

| Layered $C2/m$           | <b>Na<sub>3</sub>NbO<sub>4</sub></b> | <b>Li<sub>3</sub>NbO<sub>4</sub></b> | <b>Na<sub>3</sub>TaO<sub>4</sub></b> | <b>Li<sub>3</sub>TaO<sub>4</sub></b> |
|--------------------------|--------------------------------------|--------------------------------------|--------------------------------------|--------------------------------------|
| $a$ (Å)                  | 11.2122                              | 10.3770                              | 11.2571                              | 10.4328                              |
| $b$ (Å)                  | 13.1336                              | 12.0303                              | 13.1432                              | 12.0683                              |
| $c$ (Å)                  | 5.8035                               | 5.1865                               | 5.8262                               | 5.2108                               |
| $\beta$ (°)              | 109.33                               | 109.23                               | 109.66                               | 109.55                               |
| Volume (Å <sup>3</sup> ) | 806.397                              | 611.337                              | 811.741                              | 618.229                              |

**Supplementary Table S4.** Calculated lattice and NMR parameters for L-Li<sub>3</sub>NbO<sub>4</sub> containing residual Na<sup>+</sup>.

|                                                                                                                                                                                          | Site | $\sigma_{iso}$ (ppm) | $\delta_{aniso}$ (ppm) | $\eta_{CS}$ | $C_Q$ (kHz) <sup>a</sup> | $\eta_Q$ |
|------------------------------------------------------------------------------------------------------------------------------------------------------------------------------------------|------|----------------------|------------------------|-------------|--------------------------|----------|
| L-(Na <sub>1/6</sub> Li <sub>5/6</sub> ) <sub>3</sub> NbO <sub>4</sub><br>$a = 10.8887 \text{ \AA}$<br>$b = 12.1952 \text{ \AA}$<br>$c = 5.3497 \text{ \AA}$<br>$\beta = 112.6^\circ$    | Na1  | 530.98               | 13.47                  | 0.71        | 1.7                      | 0.71     |
|                                                                                                                                                                                          | Li2  | 90.42                | -2.61                  | 0.35        | -0.12                    | 0.34     |
|                                                                                                                                                                                          | Li3  | 89.92                | -1.77                  | 0.32        | 0.14                     | 0.40     |
|                                                                                                                                                                                          | Li4  | 91.20                | 2.13                   | 0.45        | -0.13                    | 0.25     |
|                                                                                                                                                                                          | Li5  | 90.55                | 1.18                   | 0.29        | -0.065                   | 0.62     |
|                                                                                                                                                                                          | Li6  | 89.01                | -2.53                  | 0.59        | -0.28                    | 0.15     |
|                                                                                                                                                                                          | Nb1  | 277.98               | -179.76                | 0.43        | -28.0                    | 0.47     |
|                                                                                                                                                                                          | Nb2  | 302.91               | 120.83                 | 0.89        | -17.2                    | 0.84     |
| L-(Na <sub>1/6</sub> Li <sub>5/6</sub> ) <sub>3</sub> NbO <sub>4</sub><br>$a = 10.4812 \text{ \AA}$<br>$b = 12.6983 \text{ \AA}$<br>$c = 5.1770 \text{ \AA}$<br>$\beta = 107.7^\circ$    | Li1  | 89.26                | -1.65                  | 0.11        | 0.054                    | 0.88     |
|                                                                                                                                                                                          | Na2  | 531.10               | 19.25                  | 0.34        | -1.9                     | 0.40     |
|                                                                                                                                                                                          | Li3  | 90.07                | -0.91                  | 0.49        | -0.12                    | 0.54     |
|                                                                                                                                                                                          | Li4  | 90.98                | -0.67                  | 0.68        | 0.03                     | 0.84     |
|                                                                                                                                                                                          | Li5  | 89.72                | -0.75                  | 0.28        | 0.094                    | 0.06     |
|                                                                                                                                                                                          | Li6  | 89.75                | -3.44                  | 0.41        | -0.092                   | 0.29     |
|                                                                                                                                                                                          | Nb1  | 248.59               | -92.87                 | 0.27        | 46.7                     | 0.13     |
|                                                                                                                                                                                          | Nb2  | 299.71               | 121.24                 | 0.35        | 12.7                     | 0.76     |
| L-(Na <sub>1/3</sub> Li <sub>2/3</sub> ) <sub>3</sub> NbO <sub>4</sub><br>$a = 10.6024 \text{ \AA}$<br>$b = 12.3521 \text{ \AA}$<br>$c = 5.5097 \text{ \AA}$<br>$\beta = 108.6^\circ$    | Li1  | 89.24                | -0.75                  | 0.27        | -0.054                   | 0.62     |
|                                                                                                                                                                                          | Li2  | 90.28                | -1.51                  | 0.81        | 0.095                    | 0.78     |
|                                                                                                                                                                                          | Na3  | 531.69               | -4.31                  | 0.58        | 1.8                      | 0.84     |
|                                                                                                                                                                                          | Li4  | 90.99                | -1.01                  | 0.54        | 0.10                     | 0.29     |
|                                                                                                                                                                                          | Li5  | 90.15                | -1.23                  | 0.11        | -0.081                   | 0.85     |
|                                                                                                                                                                                          | Li6  | 89.63                | -2.77                  | 0.48        | -0.15                    | 0.01     |
|                                                                                                                                                                                          | Nb1  | 280.00               | -89.77                 | 0.50        | 38.8                     | 0.32     |
|                                                                                                                                                                                          | Nb2  | 293.59               | 93.28                  | 0.64        | -10.1                    | 0.05     |
| L-(Na <sub>1/12</sub> Li <sub>11/12</sub> ) <sub>3</sub> NbO <sub>4</sub><br>$a = 10.4278 \text{ \AA}$<br>$b = 12.0855 \text{ \AA}$<br>$c = 5.3098 \text{ \AA}$<br>$\beta = 109.1^\circ$ | Li1  | 88.87                | -0.56                  | 0.30        | 0.031                    | 0.34     |
|                                                                                                                                                                                          | Li2  | 90.19                | -1.21                  | 0.91        | 0.12                     | 0.63     |
|                                                                                                                                                                                          | Li3  | 90.19                | 0.59                   | 0.69        | 0.058                    | 0.19     |
|                                                                                                                                                                                          | Na4  | 524.95               | -7.97                  | 0.55        | -1.4                     | 0.04     |
|                                                                                                                                                                                          | Li5  | 90.09                | 0.77                   | 0.63        | -0.048                   | 0.75     |
|                                                                                                                                                                                          | Li6  | 89.44                | -3.27                  | 0.42        | -0.13                    | 0.44     |
|                                                                                                                                                                                          | Nb1  | 280.81               | -151.84                | 0.08        | 44.1                     | 0.42     |
|                                                                                                                                                                                          | Nb2  | 327.43               | 118.91                 | 0.92        | 20.8                     | 0.75     |
| L-(Na <sub>1/6</sub> Li <sub>5/6</sub> ) <sub>3</sub> NbO <sub>4</sub><br>$a = 10.5787 \text{ \AA}$<br>$b = 12.1957 \text{ \AA}$<br>$c = 5.4092 \text{ \AA}$                             | Li1  | 89.21                | -0.81                  | 0.27        | -0.026                   | 0.50     |
|                                                                                                                                                                                          | Li2  | 90.36                | 3.25                   | 0.80        | -0.058                   | 0.69     |
|                                                                                                                                                                                          | Li3  | 90.00                | -0.77                  | 0.14        | 0.11                     | 0.43     |
|                                                                                                                                                                                          | Li4  | 90.72                | 1.97                   | 0.61        | -0.13                    | 0.09     |
|                                                                                                                                                                                          | Na5  | 531.55               | 10.47                  | 0.26        | 0.40                     | 0.54     |

|                                                                                                                                                                                          |                                                                                                                                                                                       |        |         |       |        |      |
|------------------------------------------------------------------------------------------------------------------------------------------------------------------------------------------|---------------------------------------------------------------------------------------------------------------------------------------------------------------------------------------|--------|---------|-------|--------|------|
| $\beta = 111.2^\circ$                                                                                                                                                                    | Li6                                                                                                                                                                                   | 89.97  | -3.16   | 0.43  | -0.12  | 0.12 |
|                                                                                                                                                                                          | Nb1                                                                                                                                                                                   | 277.17 | -124.57 | 0.38  | 25.3   | 0.03 |
|                                                                                                                                                                                          | Nb2                                                                                                                                                                                   | 339.57 | 104.35  | 0.73  | -40.2  | 0.10 |
| L-(Na <sub>1/12</sub> Li <sub>11/12</sub> ) <sub>3</sub> NbO <sub>4</sub><br>$a = 10.5282 \text{ \AA}$<br>$b = 12.0242 \text{ \AA}$<br>$c = 5.2459 \text{ \AA}$<br>$\beta = 108.5^\circ$ | Li1                                                                                                                                                                                   | 89.00  | -0.65   | 0.64  | 0.044  | 0.27 |
|                                                                                                                                                                                          | Li2                                                                                                                                                                                   | 90.12  | -3.30   | 0.74  | 0.13   | 0.51 |
|                                                                                                                                                                                          | Li3                                                                                                                                                                                   | 90.15  | -0.56   | 0.32  | 0.052  | 0.96 |
|                                                                                                                                                                                          | Li4                                                                                                                                                                                   | 91.09  | 1.39    | 0.27  | -0.057 | 0.21 |
|                                                                                                                                                                                          | Li5                                                                                                                                                                                   | 90.30  | -0.39   | 0.46  | 0.11   | 0.37 |
|                                                                                                                                                                                          | Na6                                                                                                                                                                                   | 526.45 | -27.90  | 0.38  | 1.8    | 0.93 |
|                                                                                                                                                                                          | Nb1                                                                                                                                                                                   | 290.94 | -138.17 | 0.28  | 22.5   | 0.74 |
|                                                                                                                                                                                          | Nb2                                                                                                                                                                                   | 318.52 | 149.82  | 0.21  | -22.0  | 0.47 |
|                                                                                                                                                                                          | L-(Na <sub>1/3</sub> Li <sub>2/3</sub> ) <sub>3</sub> NbO <sub>4</sub><br>$a = 10.7688 \text{ \AA}$<br>$b = 13.0701 \text{ \AA}$<br>$c = 5.2191 \text{ \AA}$<br>$\beta = 108.4^\circ$ | Na1    | 546.22  | 14.14 | 0.72   | 1.2  |
| Na2                                                                                                                                                                                      |                                                                                                                                                                                       | 544.21 | 18.27   | 0.56  | -2.8   | 0.18 |
| Li3                                                                                                                                                                                      |                                                                                                                                                                                       | 89.87  | -0.71   | 0.65  | -0.14  | 0.49 |
| Li4                                                                                                                                                                                      |                                                                                                                                                                                       | 90.96  | -1.09   | 0.45  | -0.042 | 0.50 |
| Li5                                                                                                                                                                                      |                                                                                                                                                                                       | 89.83  | -1.06   | 0.53  | 0.13   | 0.73 |
| Li6                                                                                                                                                                                      |                                                                                                                                                                                       | 89.42  | -2.82   | 0.49  | -0.20  | 0.01 |
| Nb1                                                                                                                                                                                      |                                                                                                                                                                                       | 234.97 | -115.37 | 0.25  | 50.5   | 0.35 |
| Nb2                                                                                                                                                                                      |                                                                                                                                                                                       | 264.38 | 145.14  | 0.54  | 21.6   | 0.73 |

<sup>3</sup>C<sub>Q</sub> for <sup>7</sup>Li nucleus. <sup>6</sup>Li C<sub>Q</sub>s are scaled by  $Q(^6\text{Li})/Q(^7\text{Li}) = 0.808/40.1$ .

**Supplementary Table S5.** Calculated lattice and NMR parameters for L-Li<sub>3</sub>NbO<sub>4</sub> containing residual H<sup>+</sup>.

|                                                                                                                                                                                         | Site | $\sigma_{iso}$ (ppm) | $\delta_{aniso}$ (ppm) | $\eta_{CS}$ | $C_Q$ (kHz) <sup>a</sup> | $\eta_Q$ |
|-----------------------------------------------------------------------------------------------------------------------------------------------------------------------------------------|------|----------------------|------------------------|-------------|--------------------------|----------|
| L-(H <sub>1/6</sub> Li <sub>5/6</sub> ) <sub>3</sub> NbO <sub>4</sub><br>$a = 10.3078 \text{ \AA}$<br>$b = 12.3012 \text{ \AA}$<br>$c = 5.1978 \text{ \AA}$<br>$\beta = 108.0^\circ$    | H1   | 12.24                | -16.81                 | 0.49        |                          |          |
|                                                                                                                                                                                         | Li2  | 89.73                | 1.06                   | 0.69        | 0.10                     | 0.48     |
|                                                                                                                                                                                         | Li3  | 90.28                | -1.83                  | 0.63        | 0.10                     | 0.56     |
|                                                                                                                                                                                         | Li4  | 90.94                | -1.62                  | 0.35        | 0.082                    | 0.69     |
|                                                                                                                                                                                         | Li5  | 89.98                | 1.36                   | 0.03        | 0.087                    | 0.24     |
|                                                                                                                                                                                         | Li6  | 87.61                | -4.13                  | 0.62        | -0.14                    | 0.74     |
|                                                                                                                                                                                         | Nb1  | 350.15               | -274.93                | 0.46        | -45.9                    | 0.57     |
|                                                                                                                                                                                         | Nb2  | 294.50               | 215.25                 | 0.33        | -30.9                    | 0.36     |
| L-(H <sub>1/6</sub> Li <sub>5/6</sub> ) <sub>3</sub> NbO <sub>4</sub><br>$a = 10.8488 \text{ \AA}$<br>$b = 11.3108 \text{ \AA}$<br>$c = 5.3523 \text{ \AA}$<br>$\beta = 111.5^\circ$    | Li1  | 88.08                | -1.34                  | 0.02        | 0.17                     | 0.59     |
|                                                                                                                                                                                         | H2   | 11.77                | -8.65                  | 0.33        |                          |          |
|                                                                                                                                                                                         | Li3  | 89.88                | -1.05                  | 0.06        | 0.091                    | 0.62     |
|                                                                                                                                                                                         | Li4  | 88.92                | 3.59                   | 0.36        | -0.33                    | 0.11     |
|                                                                                                                                                                                         | Li5  | 89.10                | -0.91                  | 0.02        | 0.14                     | 0.85     |
|                                                                                                                                                                                         | Li6  | 90.61                | -6.29                  | 0.34        | 0.23                     | 0.13     |
|                                                                                                                                                                                         | Nb1  | 340.58               | 254.21                 | 0.74        | 78.5                     | 0.70     |
|                                                                                                                                                                                         | Nb2  | 143.93               | 172.14                 | 0.29        | 119                      | 0.94     |
| L-(H <sub>1/3</sub> Li <sub>2/3</sub> ) <sub>3</sub> NbO <sub>4</sub><br>$a = 10.9188 \text{ \AA}$<br>$b = 12.3626 \text{ \AA}$<br>$c = 5.7249 \text{ \AA}$<br>$\beta = 122.1^\circ$    | Li1  | 87.83                | -1.54                  | 0.93        | 0.23                     | 0.95     |
|                                                                                                                                                                                         | Li2  | 90.61                | 1.91                   | 0.82        | -0.28                    | 0.50     |
|                                                                                                                                                                                         | H3   | 18.95                | -3.32                  | 0.34        |                          |          |
|                                                                                                                                                                                         | Li4  | 91.12                | 4.58                   | 0.97        | -0.31                    | 0.84     |
|                                                                                                                                                                                         | Li5  | 90.89                | 2.85                   | 0.48        | 0.16                     | 0.86     |
|                                                                                                                                                                                         | Li6  | 88.18                | 2.63                   | 0.12        | 0.30                     | 0.99     |
|                                                                                                                                                                                         | Nb1  | 175.82               | -430.60                | 0.01        | -197                     | 0.68     |
|                                                                                                                                                                                         | Nb2  | 316.66               | 165.63                 | 0.15        | -79.0                    | 0.60     |
| L-(H <sub>1/12</sub> Li <sub>11/12</sub> ) <sub>3</sub> NbO <sub>4</sub><br>$a = 10.6543 \text{ \AA}$<br>$b = 11.7842 \text{ \AA}$<br>$c = 5.3082 \text{ \AA}$<br>$\beta = 114.1^\circ$ | Li1  | 88.60                | -0.75                  | 0.62        | -0.077                   | 0.30     |
|                                                                                                                                                                                         | Li2  | 90.08                | -3.87                  | 0.56        | 0.15                     | 0.16     |
|                                                                                                                                                                                         | Li3  | 89.51                | 1.47                   | 0.46        | -0.11                    | 0.94     |
|                                                                                                                                                                                         | H4   | 11.02                | 3.44                   | 0.62        |                          |          |
|                                                                                                                                                                                         | Li5  | 90.85                | 1.89                   | 0.49        | -0.084                   | 0.82     |
|                                                                                                                                                                                         | Li6  | 89.57                | -2.90                  | 0.56        | -0.18                    | 0.60     |
|                                                                                                                                                                                         | Nb1  | 313.50               | 130.89                 | 0.93        | -27.1                    | 0.17     |
|                                                                                                                                                                                         | Nb2  | 329.66               | 103.11                 | 0.38        | -12.5                    | 0.15     |
| L-(H <sub>1/6</sub> Li <sub>5/6</sub> ) <sub>3</sub> NbO <sub>4</sub><br>$a = 10.6073 \text{ \AA}$<br>$b = 12.1838 \text{ \AA}$<br>$c = 5.0354 \text{ \AA}$<br>$\beta = 89.1^\circ$     | Li1  | 89.59                | -1.51                  | 0.03        | 0.073                    | 0.52     |
|                                                                                                                                                                                         | Li2  | 89.16                | -1.61                  | 0.97        | -0.27                    | 0.38     |
|                                                                                                                                                                                         | Li3  | 88.81                | -2.99                  | 0.93        | 0.14                     | 0.86     |
|                                                                                                                                                                                         | Li4  | 89.18                | -12.35                 | 0.13        | 0.53                     | 0.11     |
|                                                                                                                                                                                         | H5   | 11.20                | -13.05                 | 0.01        |                          |          |



|                                                                                                                                          |     |        |         |      |       |      |
|------------------------------------------------------------------------------------------------------------------------------------------|-----|--------|---------|------|-------|------|
|                                                                                                                                          | Li6 | 89.01  | -15.52  | 0.12 | 0.51  | 0.16 |
|                                                                                                                                          | Nb1 | 266.55 | 157.49  | 0.38 | 111   | 0.07 |
|                                                                                                                                          | Nb2 | 325.79 | 178.39  | 0.63 | -50.4 | 0.01 |
| L-(H <sub>1/12</sub> Li <sub>11/12</sub> ) <sub>3</sub> NbO <sub>4</sub><br>a = 10.5857 Å<br>b = 11.8977 Å<br>c = 5.3371 Å<br>β = 113.9° | Li1 | 88.72  | 2.09    | 0.35 | -0.13 | 0.11 |
|                                                                                                                                          | Li2 | 90.09  | -1.75   | 0.38 | 0.12  | 0.63 |
|                                                                                                                                          | Li3 | 89.81  | 1.67    | 0.84 | 0.10  | 0.99 |
|                                                                                                                                          | Li4 | 91.32  | 1.33    | 0.44 | -0.12 | 0.19 |
|                                                                                                                                          | Li5 | 90.62  | 1.88    | 0.34 | -0.10 | 0.32 |
|                                                                                                                                          | H6  | 8.09   | -3.38   | 0.21 |       |      |
|                                                                                                                                          | Nb1 | 312.43 | -110.10 | 0.55 | 16.7  | 0.21 |
|                                                                                                                                          | Nb2 | 308.39 | 117.45  | 0.59 | -17.5 | 0.01 |
| L-(H <sub>1/3</sub> Li <sub>2/3</sub> ) <sub>3</sub> NbO <sub>4</sub><br>a = 10.2121 Å<br>b = 11.7563 Å<br>c = 5.9172 Å<br>β = 99.4°     | H1  | 12.93  | -19.45  | 0.39 |       |      |
|                                                                                                                                          | H2  | 13.78  | -16.22  | 0.01 |       |      |
|                                                                                                                                          | Li3 | 89.27  | -3.32   | 0.35 | 0.22  | 0.62 |
|                                                                                                                                          | Li4 | 90.30  | -9.71   | 0.10 | 0.51  | 0.07 |
|                                                                                                                                          | Li5 | 89.56  | -4.97   | 0.33 | 0.24  | 0.97 |
|                                                                                                                                          | Li6 | 86.07  | -4.37   | 0.87 | -0.35 | 0.46 |
|                                                                                                                                          | Nb1 | 377.60 | -298.56 | 0.54 | 52.6  | 0.47 |
|                                                                                                                                          | Nb2 | 239.54 | 296.45  | 0.42 | 17.8  | 0.40 |

<sup>3</sup>C<sub>Q</sub> for <sup>7</sup>Li nucleus. <sup>6</sup>Li C<sub>Q</sub>s are scaled by  $Q(^6\text{Li})/Q(^7\text{Li}) = 0.808/40.1$ .
